# Supplementary material for: Pouteria lucuma Pulp and Skin: In Depth Chemical Profile and Evaluation of Antioxidant Activity
Source: MDPI journal article supplement (doi:10.3390/molecules26175236), 2021-08-29
Supplement: s1 [file s1]

# ***Pouteria lucuma* Pulp and Skin: In Depth Chemical Profile and Evaluation of Antioxidant Activity**

Milena Masullo<sup>1</sup>, Antonietta Cerulli<sup>1</sup>, Cosimo Pizza<sup>1</sup> and Sonia Piacente<sup>1,\*</sup>

<sup>1</sup> Dipartimento di Farmacia, Università degli Studi di Salerno, via Giovanni Paolo II n. 132, 84084 Fisciano (SA), Italy; piacente@unisa.it

\* Correspondence: piacente@unisa.it; Tel.: +39089969763

**Table S1.** Molecular formula  $[M-H]^-$ ,  $[(M+HCOOH)-H]^-$ , characteristic product ions (molecular formula and intensity) occurring in *P. lucuma* pulp *n*-BuOH extract and *P. lucuma* skin MeOH extract, identified by LCESI/LTQOrbitrap/MS/MS (negative ion mode).

**Figure S1.** Chromatogram of *P. lucuma* pulp extract on the C18 Synergi-Hydro-RP column

**Figure S2.** <sup>1</sup>H NMR Spectrum (600 MHz, CD<sub>3</sub>OD) of compound 1

**Figure S3.** <sup>1</sup>H NMR Spectrum (600 MHz, CD<sub>3</sub>OD) of compound 2

**Figure S4.** <sup>1</sup>H NMR Spectrum (600 MHz, CD<sub>3</sub>OD) of compound 3

**Figure S5.** <sup>1</sup>H NMR Spectrum (600 MHz, CD<sub>3</sub>OD) of compound 4

**Figure S6.** <sup>1</sup>H NMR Spectrum (600 MHz, CD<sub>3</sub>OD) of compound 5

**Figure S7.** <sup>1</sup>H NMR Spectrum (600 MHz, CD<sub>3</sub>OD) of compound 6

**Figure S8.** <sup>1</sup>H NMR Spectrum (600 MHz, CD<sub>3</sub>OD) of compound 7

**Figure S9.** <sup>1</sup>H NMR Spectrum (600 MHz, CD<sub>3</sub>OD) of compound 8

**Figure S10.** <sup>1</sup>H NMR Spectrum (600 MHz, CD<sub>3</sub>OD) of compound 9

**Figure S11.** <sup>1</sup>H NMR Spectrum (600 MHz, CD<sub>3</sub>OD) of compound 10

**Figure S12.** <sup>1</sup>H NMR Spectrum (600 MHz, CD<sub>3</sub>OD) of compound 11

**Figure S13.** <sup>1</sup>H NMR Spectrum (600 MHz, CD<sub>3</sub>OD) of compound 12

**Figure S14.** <sup>1</sup>H NMR Spectrum (600 MHz, CD<sub>3</sub>OD) of compound 13

---

**Figure S15.**  $^1\text{H}$  NMR Spectrum (600 MHz,  $\text{CD}_3\text{OD}$ ) of compound **14**

**Figure S16.**  $^1\text{H}$  NMR Spectrum (600 MHz,  $\text{CD}_3\text{OD}$ ) of compound **15**

**Figure S17.**  $^1\text{H}$  NMR Spectrum (600 MHz,  $\text{CD}_3\text{OD}$ ) of compound **16**

**Figure S18.**  $^1\text{H}$  NMR Spectrum (600 MHz,  $\text{CD}_3\text{OD}$ ) of compound **17**

**Figure S19.**  $^1\text{H}$  NMR Spectrum (600 MHz,  $\text{CD}_3\text{OD}$ ) of compound **18**

**Figure S20.**  $^1\text{H}$  NMR Spectrum (600 MHz,  $\text{CD}_3\text{OD}$ ) of compound **19**

**Figure S21.**  $^1\text{H}$  NMR Spectrum (600 MHz,  $\text{CD}_3\text{OD}$ ) of compound **20**

**Table S1.** Molecular formula  $[\text{M}-\text{H}]^-$ ,  $[(\text{M}+\text{HCOOH})-\text{H}]^-$ , characteristic product ions (molecular formula and intensity) occurring in *P. lucuma* pulp *n*-BuOH extract and *P. lucuma* skin MeOH extract, identified by LCESI/LTQOrbitrap/MS/MS (negative ion mode).

|    | compound                                                        | Molecular formula                                                   | $[(\text{M}+\text{HCOOH})-\text{H}]^-$ | $[\text{M}-\text{H}]^-$ | product ions (molecular formula, intensity)                                                                                                                 |
|----|-----------------------------------------------------------------|---------------------------------------------------------------------|----------------------------------------|-------------------------|-------------------------------------------------------------------------------------------------------------------------------------------------------------|
| 1  | galloyl 1- <i>O</i> - glucopyranoside                           | $\text{C}_{13}\text{H}_{16}\text{O}_{10}$                           |                                        | 331.0664                | 169.03 ( $\text{C}_7\text{H}_5\text{O}_5$ , 99.6)                                                                                                           |
| 2  | galocatechin                                                    | $\text{C}_{15}\text{H}_{14}\text{O}_7$                              |                                        | 305.0656                | 287.16 ( $\text{C}_{15}\text{H}_{11}\text{O}_6$ , 33.2),<br>125.15 ( $\text{C}_6\text{H}_5\text{O}_3$ , 13.6)                                               |
| 3  | <i>p</i> -coumaric acid                                         | $\text{C}_9\text{H}_8\text{O}_3$                                    | 209.0451                               |                         | 119.08 ( $\text{C}_8\text{H}_7\text{O}_0$ , 26.6),                                                                                                          |
| 4  | <i>p</i> -ferulic acid                                          | $\text{C}_{10}\text{H}_{10}\text{O}_4$                              | 239.0554                               |                         | 133.05 ( $\text{C}_8\text{H}_5\text{O}_2$ , 76.6),                                                                                                          |
| 5  | epigallocatechin                                                | $\text{C}_{15}\text{H}_{14}\text{O}_7$                              |                                        | 305.0659                | 287.01 ( $\text{C}_{15}\text{H}_{11}\text{O}_6$ , 36.8),<br>125.11 ( $\text{C}_6\text{H}_5\text{O}_3$ , 16.3)                                               |
| 6  | <i>p</i> -coumaroyl<br>glucopyranoside                          | 4- <i>O</i> - $\beta$ -D-<br>$\text{C}_{15}\text{H}_{18}\text{O}_8$ |                                        | 325.0928                | 163.12 ( $\text{C}_6\text{H}_7\text{O}_3$ , 21.5),                                                                                                          |
| 7  | catechin                                                        | $\text{C}_{15}\text{H}_{14}\text{O}_6$                              |                                        | 289.0713                | 179.05 ( $\text{C}_9\text{H}_7\text{O}_4$ , 17.47)<br>151.01( $\text{C}_8\text{H}_7\text{O}_3$ ,0.75 )<br>137.08 ( $\text{C}_7\text{H}_5\text{O}_3$ ,3.69 ) |
| 8  | <i>p</i> -feruloyl-4- <i>O</i> - $\beta$ -D-<br>glucopyranoside | $\text{C}_{16}\text{H}_{20}\text{O}_9$                              |                                        | 355.1025                | 193.18 ( $\text{C}_{10}\text{H}_9\text{O}_4$ , 36.8)                                                                                                        |
| 9  | 4-hydroxybenzoic acid<br>glucopyranoside                        | 4- <i>O</i> - $\beta$ -D-<br>$\text{C}_{13}\text{H}_{16}\text{O}_8$ |                                        | 299.0763                | 137.02 ( $\text{C}_7\text{H}_6\text{O}_3$ , 65.9)                                                                                                           |
| 10 | epicatechin                                                     | $\text{C}_{15}\text{H}_{14}\text{O}_6$                              |                                        | 289.0715                | 179.01 ( $\text{C}_9\text{H}_7\text{O}_4$ , 13.73)<br>151.02( $\text{C}_8\text{H}_7\text{O}_3$ , 0.93)<br>137.07 ( $\text{C}_7\text{H}_5\text{O}_3$ ,3.68 ) |
| 11 | galocatechin-gallate                                            | $\text{C}_{22}\text{H}_{18}\text{O}_{11}$                           |                                        | 457.0769                | 287.11 ( $\text{C}_{15}\text{H}_{11}\text{O}_6$ , 32.21)                                                                                                    |

|    |                                           |                   |                                                   |          |                                                                                                                                                                                                      |
|----|-------------------------------------------|-------------------|---------------------------------------------------|----------|------------------------------------------------------------------------------------------------------------------------------------------------------------------------------------------------------|
|    |                                           |                   |                                                   |          | 168.99 (C <sub>7</sub> H <sub>5</sub> O <sub>5</sub> , 100.00)                                                                                                                                       |
| 12 | ampelopsin                                |                   | C <sub>15</sub> H <sub>12</sub> O <sub>8</sub>    | 319.0456 | 301.12 (C <sub>15</sub> H <sub>9</sub> O <sub>7</sub> , 38.46)                                                                                                                                       |
| 13 | myricetin                                 | 3-O- $\alpha$ -L- | C <sub>21</sub> H <sub>20</sub> O <sub>12</sub>   | 479.0824 | 317.10 (C <sub>15</sub> H <sub>9</sub> O <sub>8</sub> , 58.95)                                                                                                                                       |
|    | rhamnopyranoside                          |                   |                                                   |          |                                                                                                                                                                                                      |
| 14 | resveratrol-3-O- $\beta$ -D-              |                   | C <sub>20</sub> H <sub>22</sub> O <sub>8</sub>    | 389.1232 | 227.15 (C <sub>14</sub> H <sub>11</sub> O <sub>3</sub> , 99.85)                                                                                                                                      |
|    | glucopyranoside                           |                   |                                                   |          |                                                                                                                                                                                                      |
| 15 | taxifolin                                 |                   | C <sub>15</sub> H <sub>12</sub> O <sub>7</sub>    | 303.0503 | 285.07 (C <sub>15</sub> H <sub>9</sub> O <sub>6</sub> , 100.0),<br>176.96 (C <sub>9</sub> H <sub>5</sub> O <sub>4</sub> , 10.87)                                                                     |
| 16 | quercetin                                 | 3-O- $\beta$ -D-  | C <sub>21</sub> H <sub>20</sub> O <sub>11</sub>   | 447.0927 | 300.99 (C <sub>15</sub> H <sub>9</sub> O <sub>7</sub> , 66.06)                                                                                                                                       |
|    | rhamnopyranoside                          |                   |                                                   |          |                                                                                                                                                                                                      |
| 17 | eriodictyol                               |                   | C <sub>15</sub> H <sub>12</sub> O <sub>6</sub>    | 287.0550 | 179.21 (C <sub>9</sub> H <sub>7</sub> O <sub>4</sub> , 56.06)<br>153.07 (C <sub>7</sub> H <sub>5</sub> O <sub>4</sub> , 32.03)                                                                       |
| 18 | <i>p</i> -hydroxy benzoic acid            |                   | C <sub>7</sub> H <sub>6</sub> O <sub>3</sub>      | 137.0218 | 93.05 (C <sub>6</sub> H <sub>5</sub> O, 65.01)                                                                                                                                                       |
| 19 | quercetin                                 |                   | C <sub>15</sub> H <sub>10</sub> O <sub>7</sub>    | 301.0350 | 179.01 (C <sub>8</sub> H <sub>3</sub> O <sub>5</sub> , 100.00)<br>151.01 (C <sub>8</sub> H <sub>7</sub> O <sub>3</sub> , 71.98)                                                                      |
| 20 | salicylic acid                            |                   | C <sub>7</sub> H <sub>6</sub> O <sub>3</sub>      | 137.0218 | 93.03 (C <sub>6</sub> H <sub>5</sub> O, 75.03)                                                                                                                                                       |
| 21 | TriHoDe                                   |                   | C <sub>18</sub> H <sub>32</sub> O <sub>5</sub>    | 327.2171 | 229.05 (C <sub>12</sub> H <sub>21</sub> O <sub>4</sub> , 100.00),<br>171.03 (C <sub>9</sub> H <sub>15</sub> O <sub>3</sub> , 52.18)                                                                  |
| 22 | TriHoMe                                   |                   | C <sub>18</sub> H <sub>34</sub> O <sub>5</sub>    | 329.2326 | 229.07 (C <sub>12</sub> H <sub>21</sub> O <sub>4</sub> , 100.00),<br>171.08 (C <sub>9</sub> H <sub>15</sub> O <sub>3</sub> , 55.15)                                                                  |
| 23 | TriHoDe                                   |                   | C <sub>18</sub> H <sub>28</sub> O <sub>4</sub>    | 307.1909 | 171.03 (C <sub>9</sub> H <sub>15</sub> O <sub>3</sub> , 55.26)                                                                                                                                       |
| 24 | hydroxy-epoxy-octadecadienoic acid        |                   | C <sub>18</sub> H <sub>30</sub> O <sub>4</sub>    | 309.2065 | 201.21 (C <sub>10</sub> H <sub>17</sub> O <sub>4</sub> , 52.99)<br>171.04 (C <sub>9</sub> H <sub>15</sub> O <sub>3</sub> , 67.88)                                                                    |
| 25 | hydroxy-epoxy-octadecadienoic acid isomer |                   | C <sub>18</sub> H <sub>30</sub> O <sub>4</sub>    | 309.2065 | 201.26 (C <sub>10</sub> H <sub>17</sub> O <sub>4</sub> , 56.83)<br>171.02 (C <sub>9</sub> H <sub>15</sub> O <sub>3</sub> , 67.85)                                                                    |
| 26 | DGMG (18:3)                               |                   | C <sub>33</sub> H <sub>56</sub> O <sub>14</sub>   | 721.3634 | 415.26 (C <sub>15</sub> H <sub>27</sub> O <sub>13</sub> , 3.35)<br>397.21 (C <sub>15</sub> H <sub>25</sub> O <sub>12</sub> , 18.30)<br>235.15 (C <sub>9</sub> H <sub>15</sub> O <sub>7</sub> , 0.43) |
| 27 | DGMG (18:3)                               |                   | C <sub>33</sub> H <sub>56</sub> O <sub>146</sub>  | 721.3631 | 415.29 (C <sub>15</sub> H <sub>27</sub> O <sub>13</sub> , 3.99)<br>397.24 (C <sub>15</sub> H <sub>25</sub> O <sub>12</sub> , 15.78)<br>235.12 (C <sub>9</sub> H <sub>15</sub> O <sub>7</sub> , 0.33) |
| 28 | DGMG (18:2)                               |                   | C <sub>33</sub> H <sub>58</sub> O <sub>14</sub>   | 723.3796 | 415.00 (C <sub>15</sub> H <sub>27</sub> O <sub>13</sub> , 3.56)<br>397.16 (C <sub>15</sub> H <sub>25</sub> O <sub>12</sub> , 18.31)                                                                  |
| 29 | DGMG (18:2)                               |                   | C <sub>33</sub> H <sub>58</sub> O <sub>14</sub>   | 723.3795 | 415.26 (C <sub>15</sub> H <sub>27</sub> O <sub>13</sub> , 0.99)<br>397.26 (C <sub>15</sub> H <sub>25</sub> O <sub>12</sub> , 11.36)                                                                  |
| 30 | DGMG (18:1)                               |                   | C <sub>33</sub> H <sub>60</sub> O <sub>14</sub>   | 725.3937 | 415.52 (C <sub>15</sub> H <sub>27</sub> O <sub>13</sub> , 1.18)<br>397.30 (C <sub>15</sub> H <sub>25</sub> O <sub>12</sub> , 4.76)                                                                   |
| 31 | DGMG (16:0)                               |                   | C <sub>31</sub> H <sub>58</sub> O <sub>14</sub>   | 699.3788 | 415.03 (C <sub>15</sub> H <sub>27</sub> O <sub>13</sub> , 0.58)<br>397.19 (C <sub>15</sub> H <sub>25</sub> O <sub>12</sub> , 13.89)<br>235.14 (C <sub>9</sub> H <sub>15</sub> O <sub>7</sub> , 0.62) |
| 32 | DGMG (18:1)                               |                   | C <sub>33</sub> H <sub>60</sub> O <sub>14</sub>   | 725.3937 | 415.30 (C <sub>15</sub> H <sub>27</sub> O <sub>13</sub> , 1.35)<br>397.49 (C <sub>15</sub> H <sub>25</sub> O <sub>12</sub> , 0.68)                                                                   |
| 33 | l-PC (16:0)                               |                   | C <sub>24</sub> H <sub>50</sub> O <sub>7</sub> NP | 540.3296 | 255.37 (C <sub>16</sub> H <sub>31</sub> O <sub>2</sub> , 100)                                                                                                                                        |

|    |                              |                                                   |          |          |                                                                                                                                                                                                      |
|----|------------------------------|---------------------------------------------------|----------|----------|------------------------------------------------------------------------------------------------------------------------------------------------------------------------------------------------------|
| 34 | MGMG (16:3)                  | C <sub>25</sub> H <sub>42</sub> O <sub>9</sub>    |          | 485.2744 | 235.14 (C <sub>9</sub> H <sub>15</sub> O <sub>7</sub> , 0.35)                                                                                                                                        |
| 35 | l-PC (18:1)                  | C <sub>26</sub> H <sub>52</sub> O <sub>7</sub> NP | 566.3451 |          | 281.25 (C <sub>18</sub> H <sub>33</sub> O <sub>2</sub> , 46.23)                                                                                                                                      |
| 36 | DGMG (18:0)                  | C <sub>33</sub> H <sub>62</sub> O <sub>14</sub>   | 727.4096 |          | 415.37 (C <sub>15</sub> H <sub>27</sub> O <sub>13</sub> , 2.38)                                                                                                                                      |
|    |                              |                                                   |          |          | 397.24 (C <sub>15</sub> H <sub>25</sub> O <sub>12</sub> , 17.97)                                                                                                                                     |
|    |                              |                                                   |          |          | 235.23 (C <sub>9</sub> H <sub>15</sub> O <sub>7</sub> , 0.73)                                                                                                                                        |
| 1  | galloyl 1-O- glucopyranoside | C <sub>13</sub> H <sub>16</sub> O <sub>10</sub>   |          | 331.0668 | 169.03 (C <sub>7</sub> H <sub>5</sub> O <sub>5</sub> , 99.8)                                                                                                                                         |
| 15 | taxifolin                    | C <sub>15</sub> H <sub>12</sub> O <sub>7</sub>    |          | 303.0503 | 285.08 (C <sub>15</sub> H <sub>9</sub> O <sub>6</sub> , 100.0),<br>176.96 (C <sub>9</sub> H <sub>5</sub> O <sub>4</sub> , 10.83)                                                                     |
| 17 | eriodictyol                  | C <sub>15</sub> H <sub>12</sub> O <sub>6</sub>    |          | 287.0558 | 179.21 (C <sub>9</sub> H <sub>7</sub> O <sub>4</sub> , 56.06)<br>153.07 (C <sub>7</sub> H <sub>5</sub> O <sub>4</sub> , 32.03)                                                                       |
| 19 | quercetin                    | C <sub>15</sub> H <sub>10</sub> O <sub>7</sub>    |          | 301.0346 | 179.01 (C <sub>8</sub> H <sub>3</sub> O <sub>5</sub> , 100.00)<br>151.02 (C <sub>8</sub> H <sub>7</sub> O <sub>3</sub> , 71.96)                                                                      |
| 21 | TriHoDe                      | C <sub>18</sub> H <sub>32</sub> O <sub>5</sub>    |          | 327.2169 | 229.04 (C <sub>12</sub> H <sub>21</sub> O <sub>4</sub> , 100.00),<br>171.03 (C <sub>9</sub> H <sub>15</sub> O <sub>3</sub> , 52.16)                                                                  |
| 22 | TriHOME                      | C <sub>18</sub> H <sub>34</sub> O <sub>5</sub>    |          | 329.2326 | 229.16 (C <sub>12</sub> H <sub>21</sub> O <sub>4</sub> , 100.00),<br>170.96 (C <sub>9</sub> H <sub>15</sub> O <sub>3</sub> , 77.24)                                                                  |
| 37 | ellagic acid                 | C <sub>14</sub> H <sub>6</sub> O <sub>8</sub>     |          | 300.9983 | 257.04 (C <sub>13</sub> H <sub>5</sub> O <sub>6</sub> , 76.37)                                                                                                                                       |
| 38 | DGDG (18.3, 16:0)            | C <sub>49</sub> H <sub>86</sub> O <sub>15</sub>   |          | 959.5934 | 415.26 (C <sub>15</sub> H <sub>27</sub> O <sub>13</sub> , 3.35)<br>397.21 (C <sub>15</sub> H <sub>25</sub> O <sub>12</sub> , 18.30)<br>235.15 (C <sub>9</sub> H <sub>15</sub> O <sub>7</sub> , 0.43) |

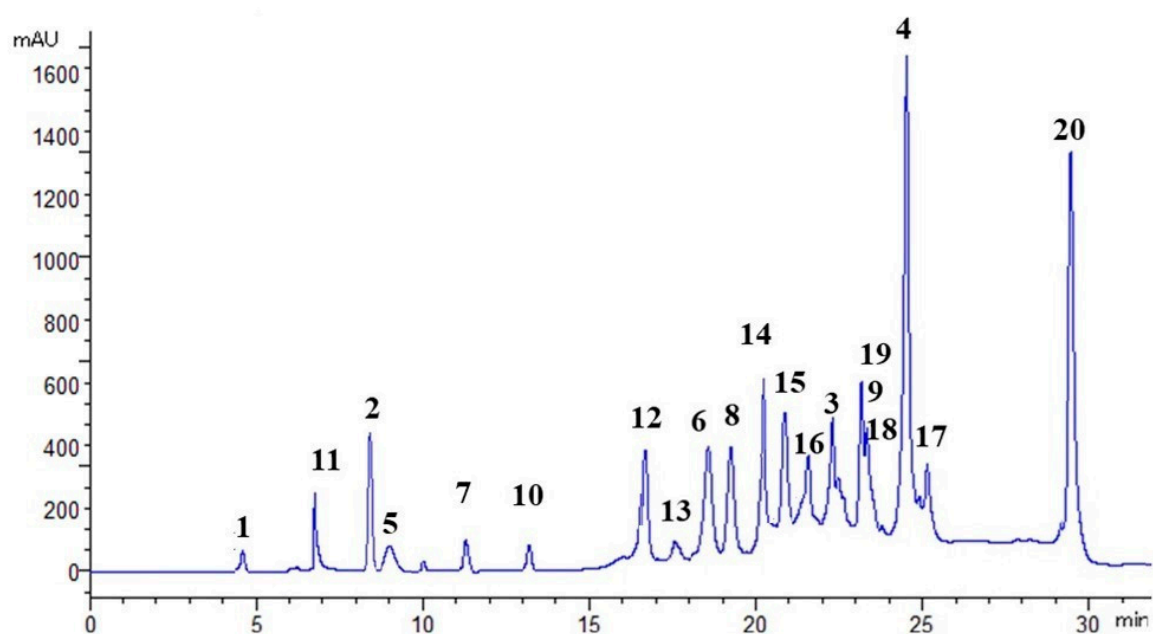

**Figure S1.** HPLC-UV Chromatogram of *P. lucuma* pulp extract at wavelength 310 nm.

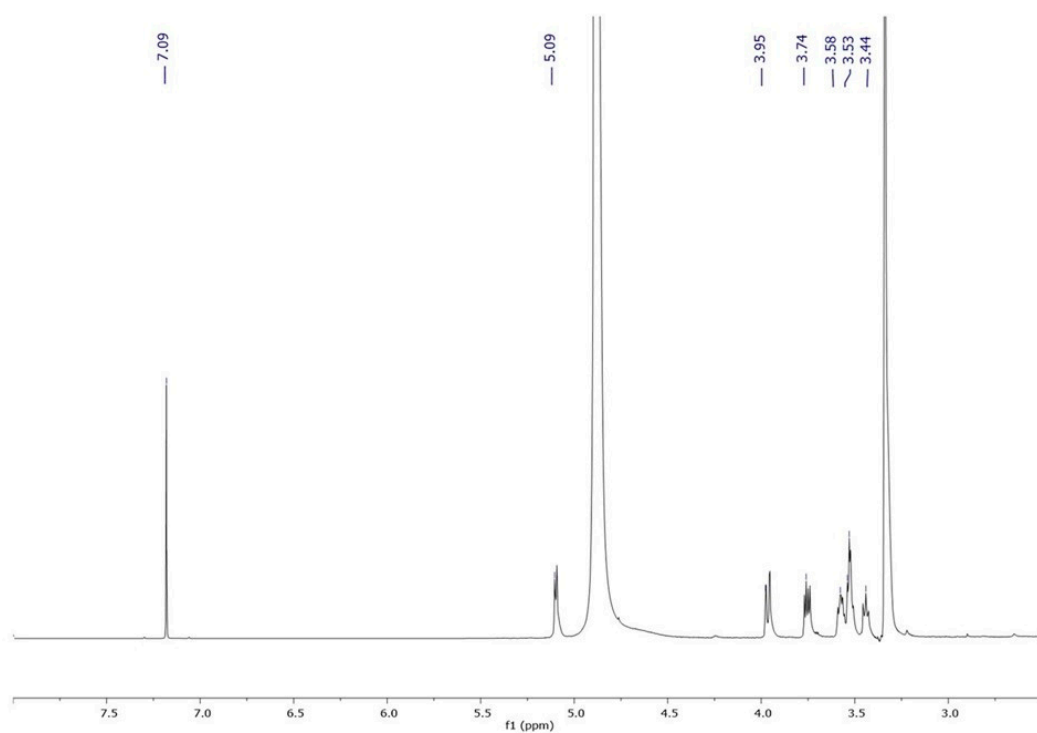

**Figure S2.** <sup>1</sup>H NMR Spectrum (600 MHz, CD<sub>3</sub>OD) of compound 1

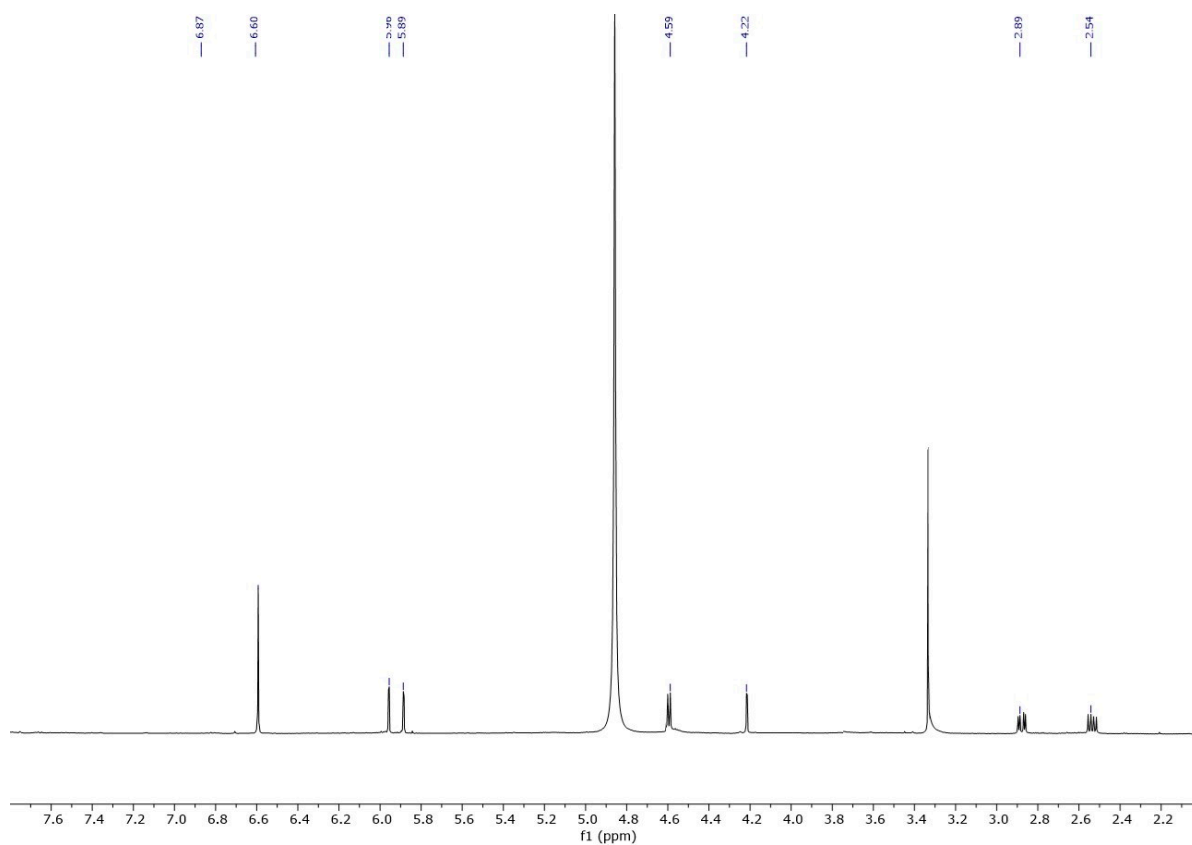

**Figure S3.** <sup>1</sup>H NMR Spectrum (600 MHz, CD<sub>3</sub>OD) of compound 2

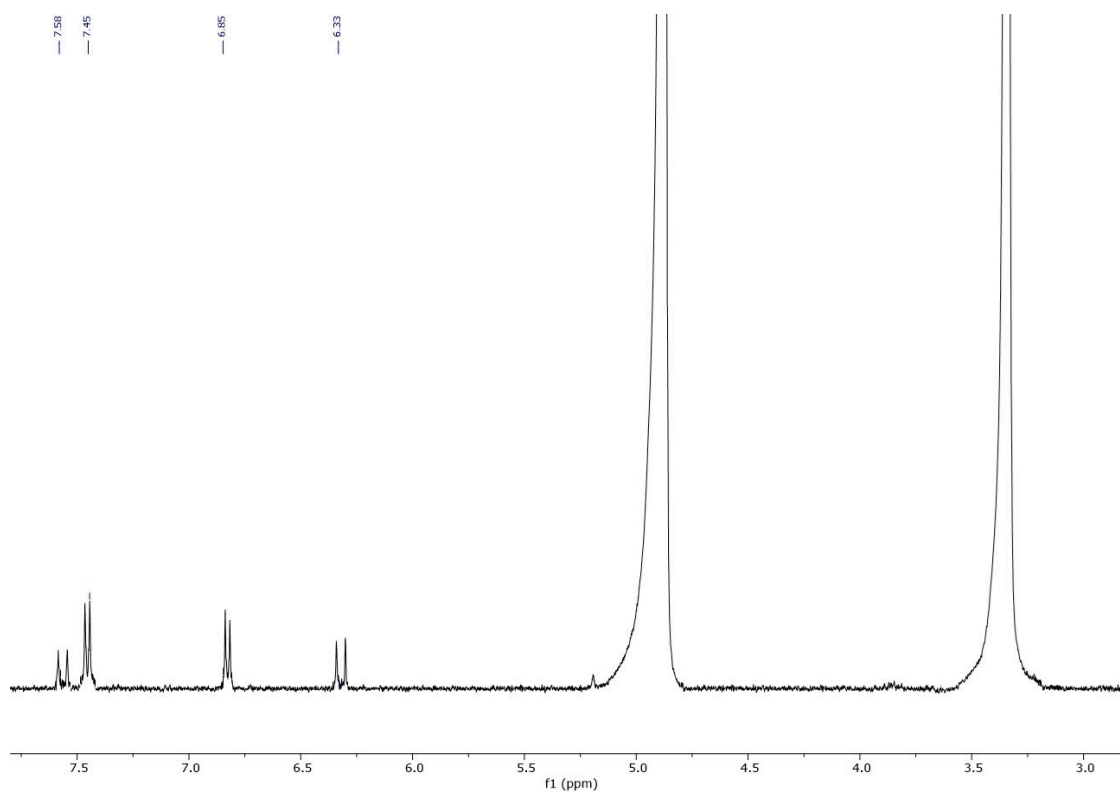

**Figure S4.** <sup>1</sup>H NMR Spectrum (600 MHz, CD<sub>3</sub>OD) of compound **3**.

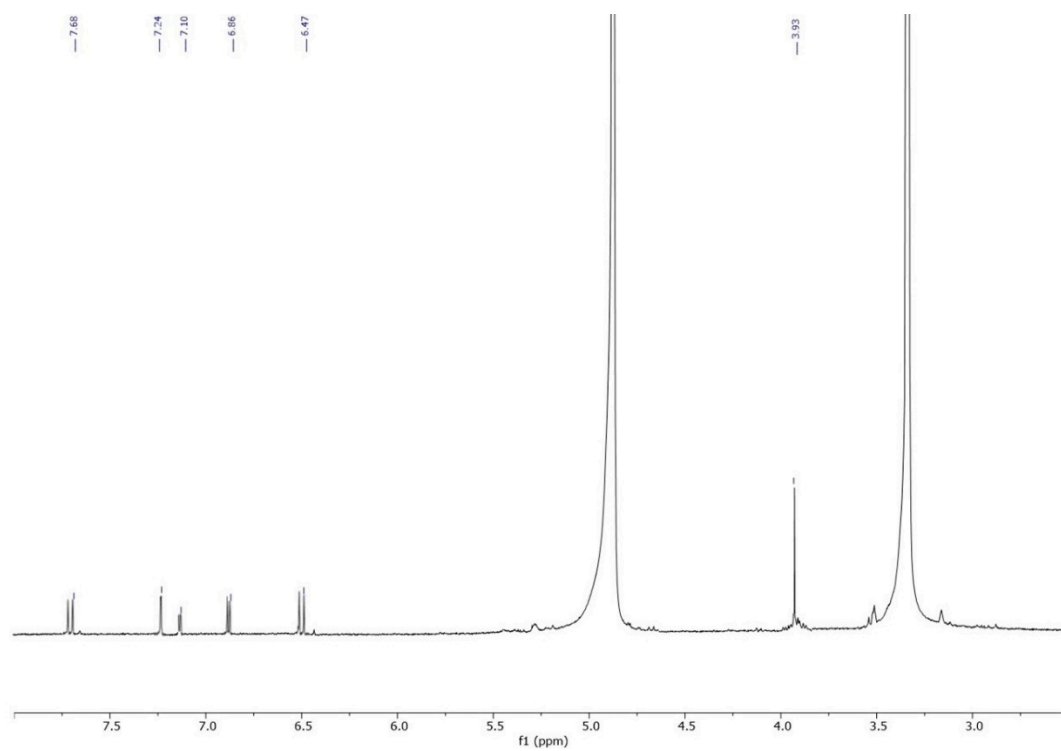

**Figure S5.** <sup>1</sup>H NMR Spectrum (600 MHz, CD<sub>3</sub>OD) of compound **4**.

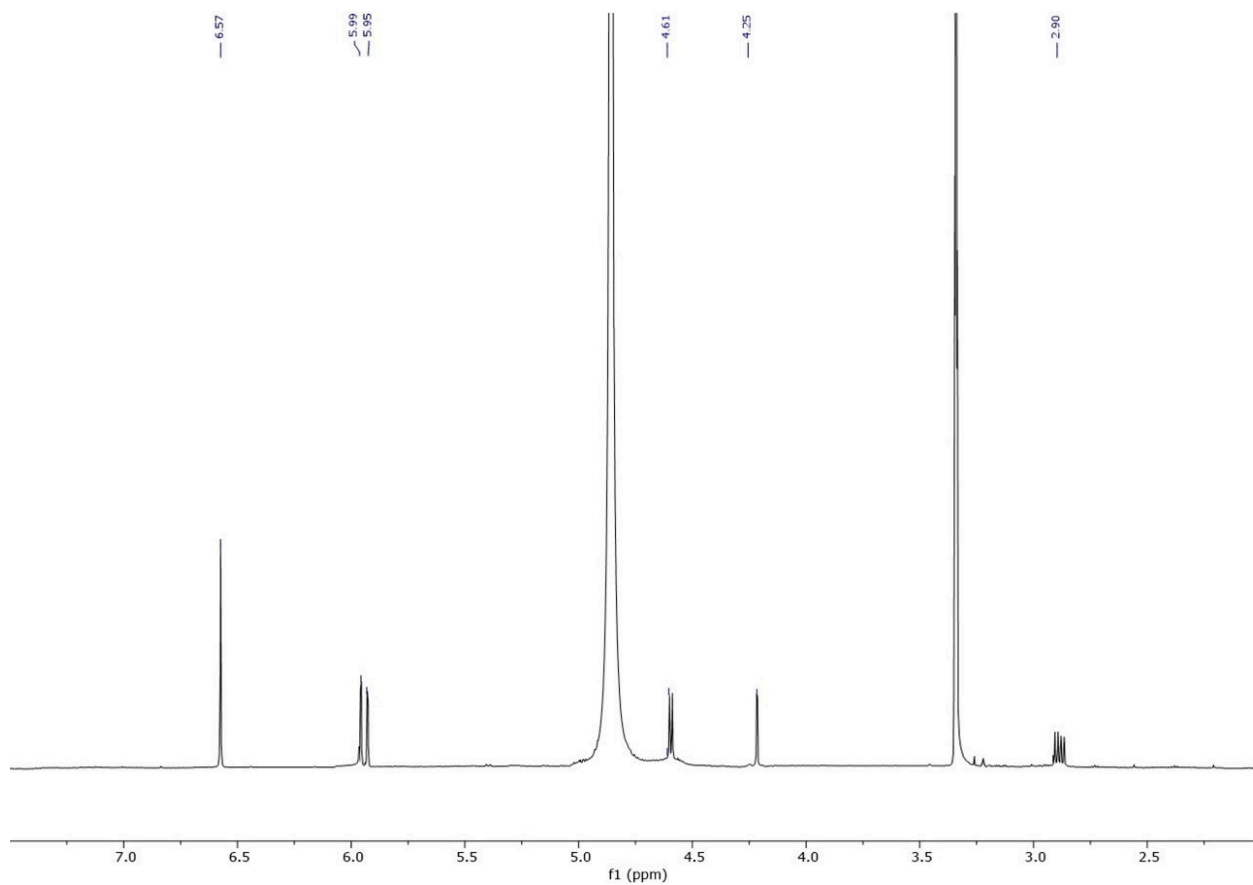

**Figure S6.** <sup>1</sup>H NMR Spectrum (600 MHz, CD<sub>3</sub>OD) of compound **5**.

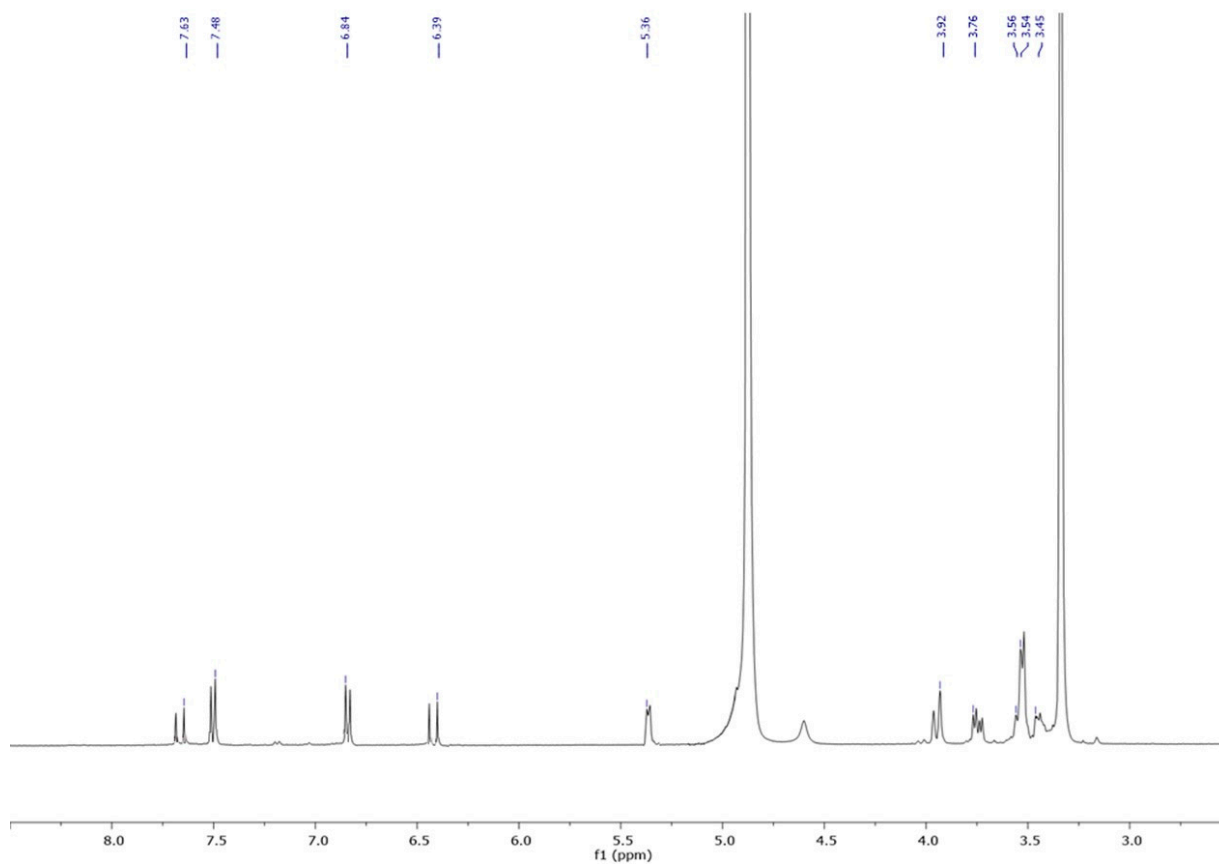

**Figure S7.**  $^1\text{H}$  NMR Spectrum (600 MHz,  $\text{CD}_3\text{OD}$ ) of compound **6**.

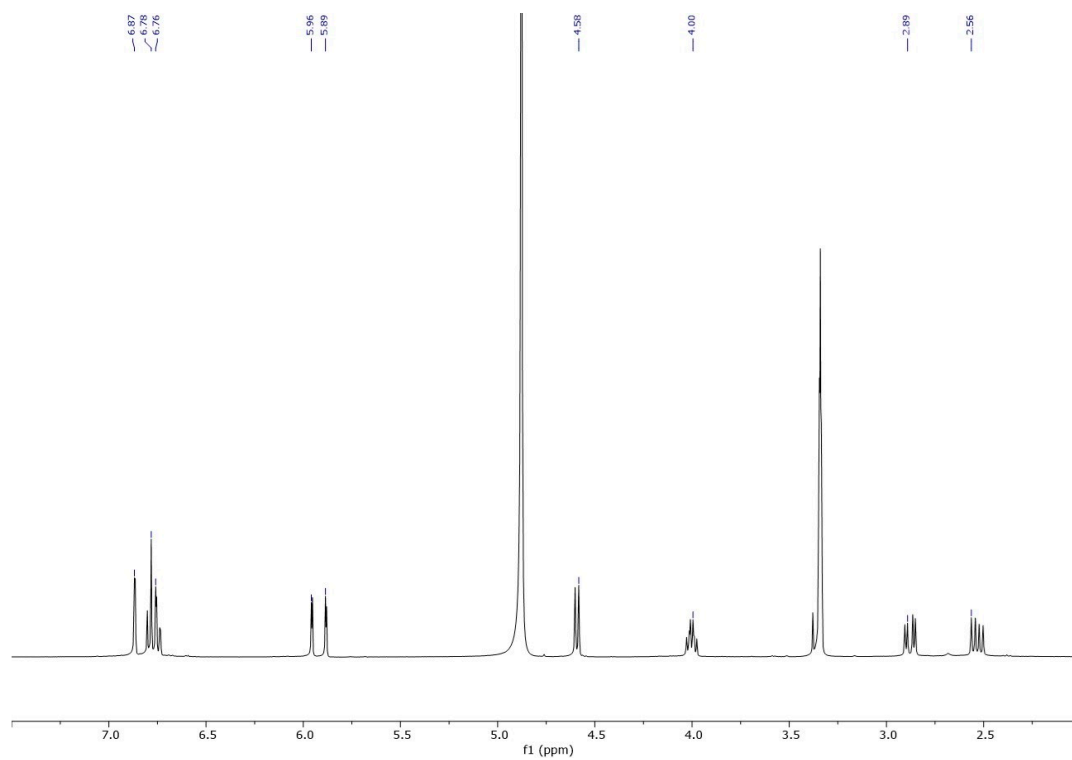

**Figure S8.**  $^1\text{H}$  NMR Spectrum (600 MHz,  $\text{CD}_3\text{OD}$ ) of compound **7**.



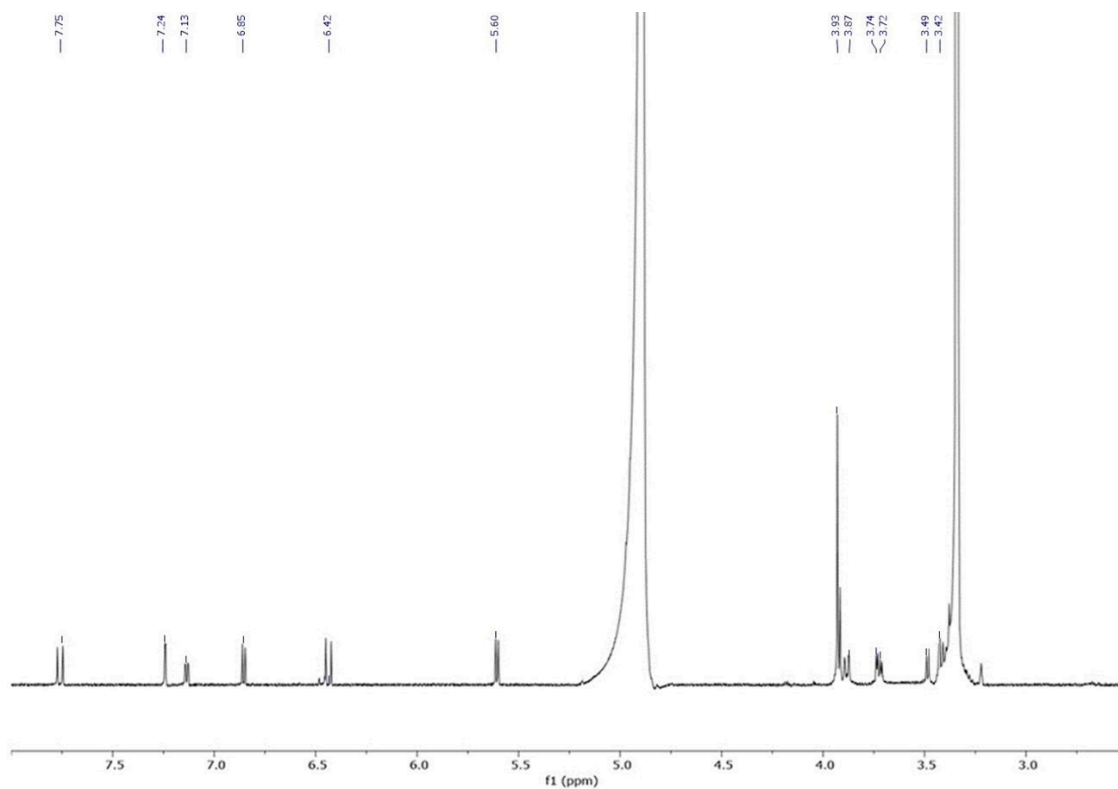

**Figure S9.**  $^1\text{H}$  NMR Spectrum (600 MHz,  $\text{CD}_3\text{OD}$ ) of compound **8**.

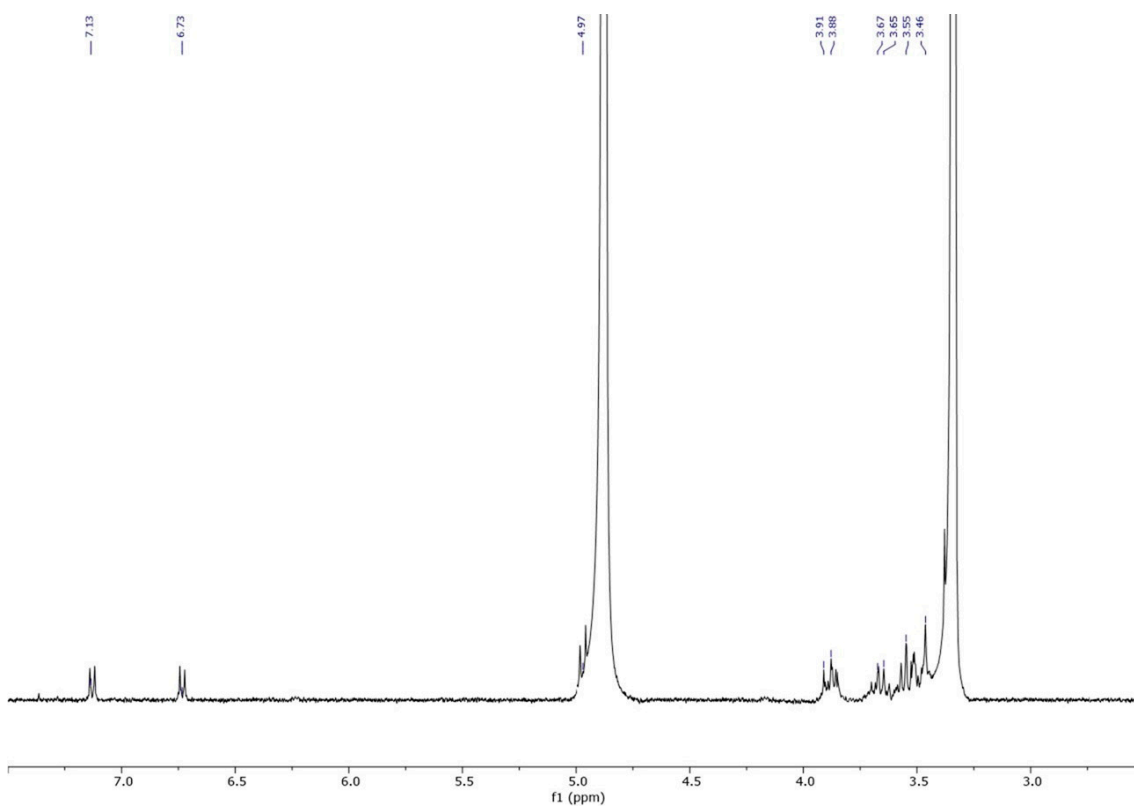

**Figure S10.**  $^1\text{H}$  NMR Spectrum (600 MHz,  $\text{CD}_3\text{OD}$ ) of compound **9**.

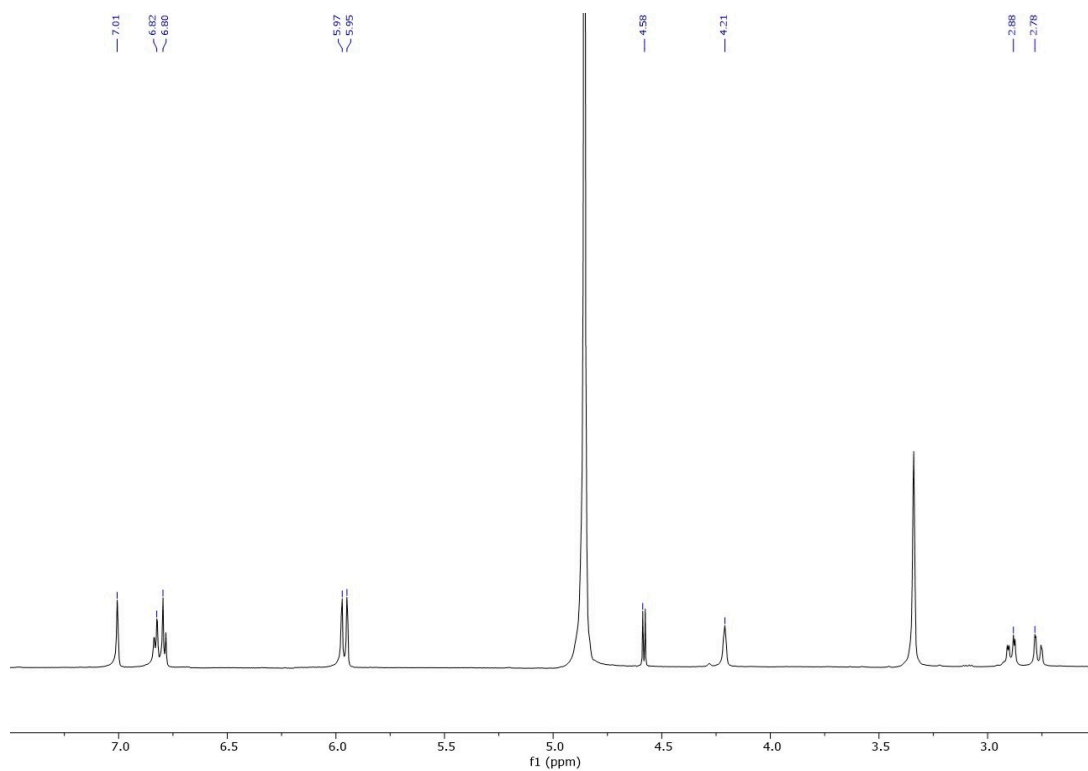

**Figure S11.** <sup>1</sup>H NMR Spectrum (600 MHz, CD<sub>3</sub>OD) of compound **10**.

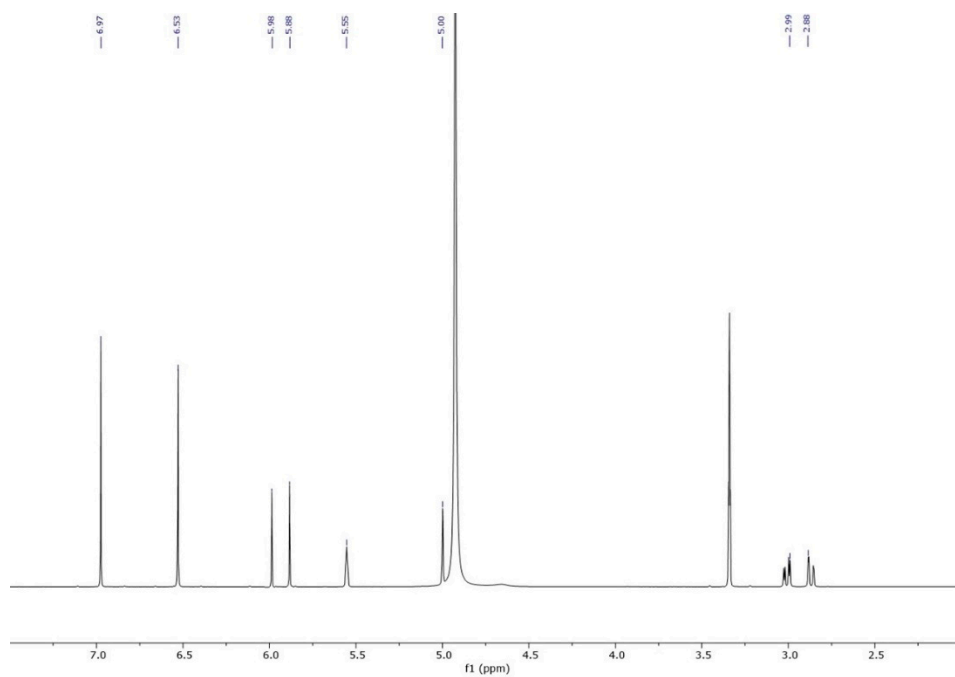

**Figure S12.** <sup>1</sup>H NMR Spectrum (600 MHz, CD<sub>3</sub>OD) of compound **11**.

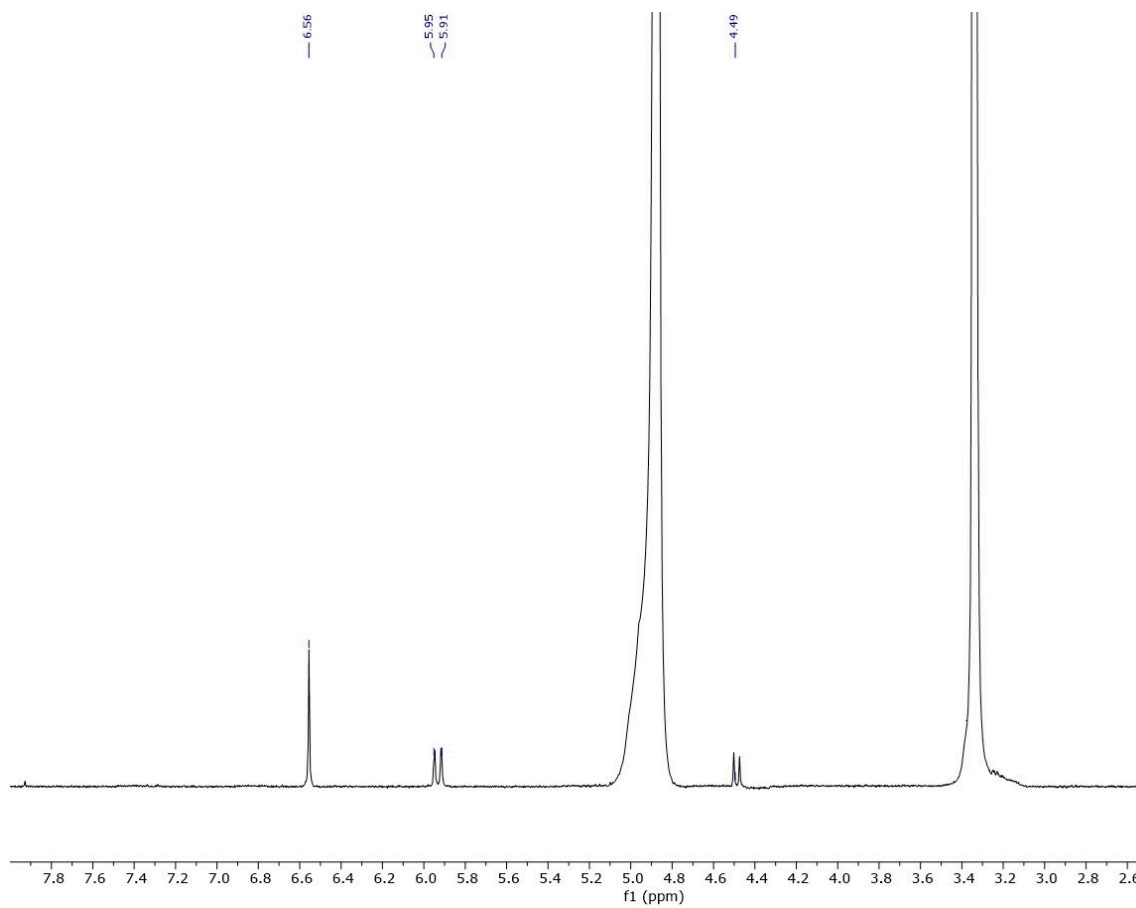

**Figure S13.** <sup>1</sup>H NMR Spectrum (600 MHz, CD<sub>3</sub>OD) of compound **12**.

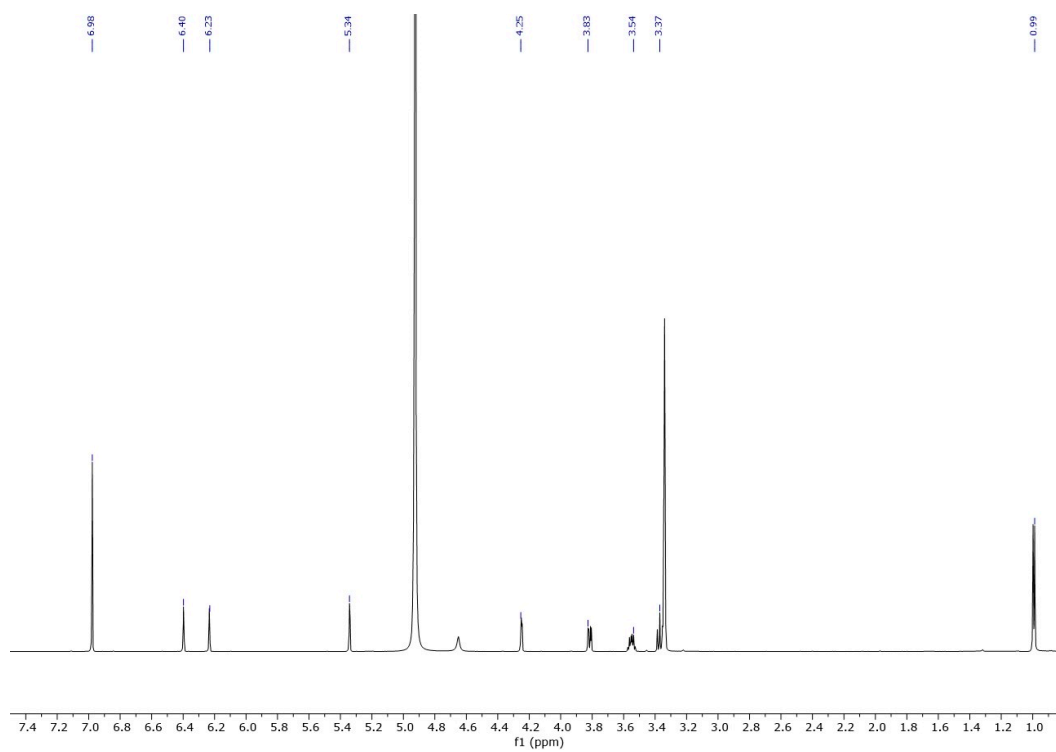

**Figure S14.** <sup>1</sup>H NMR Spectrum (600 MHz, CD<sub>3</sub>OD) of compound **13**.

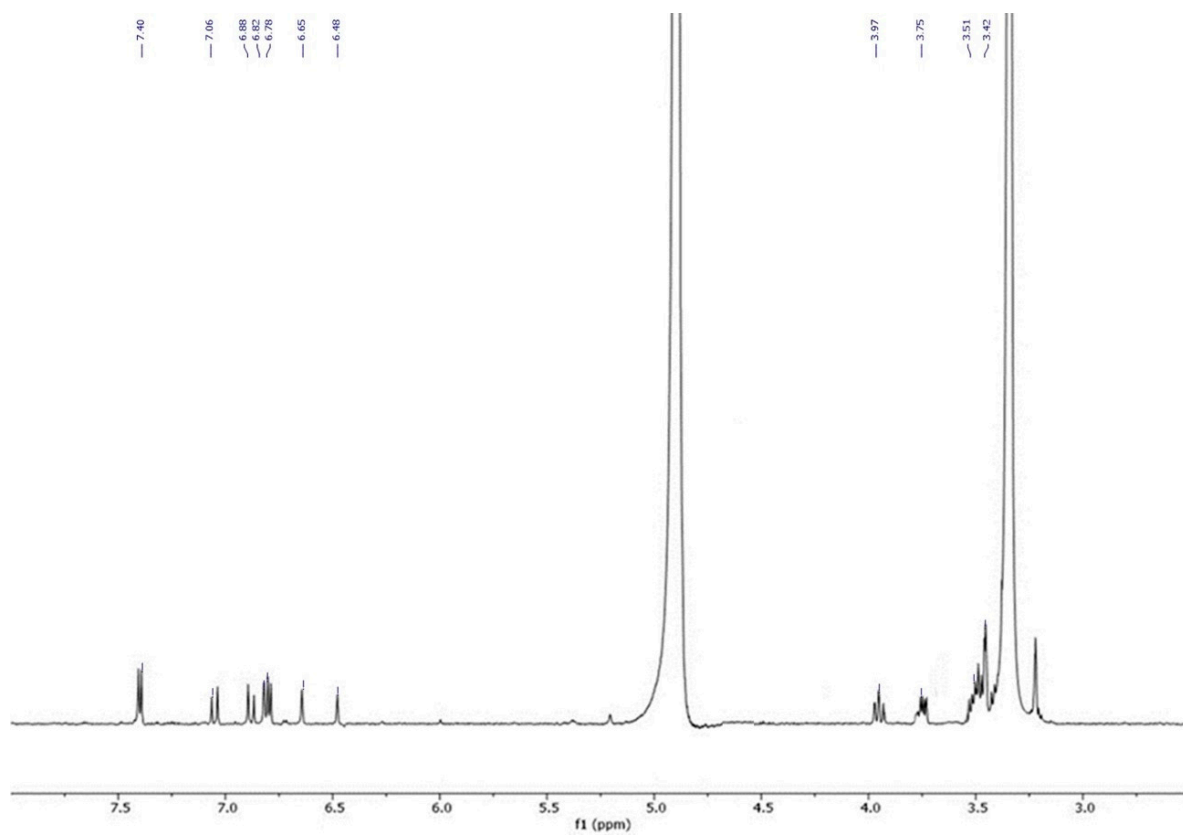

**Figure S15.** <sup>1</sup>H NMR Spectrum (600 MHz, CD<sub>3</sub>OD) of compound **14**.

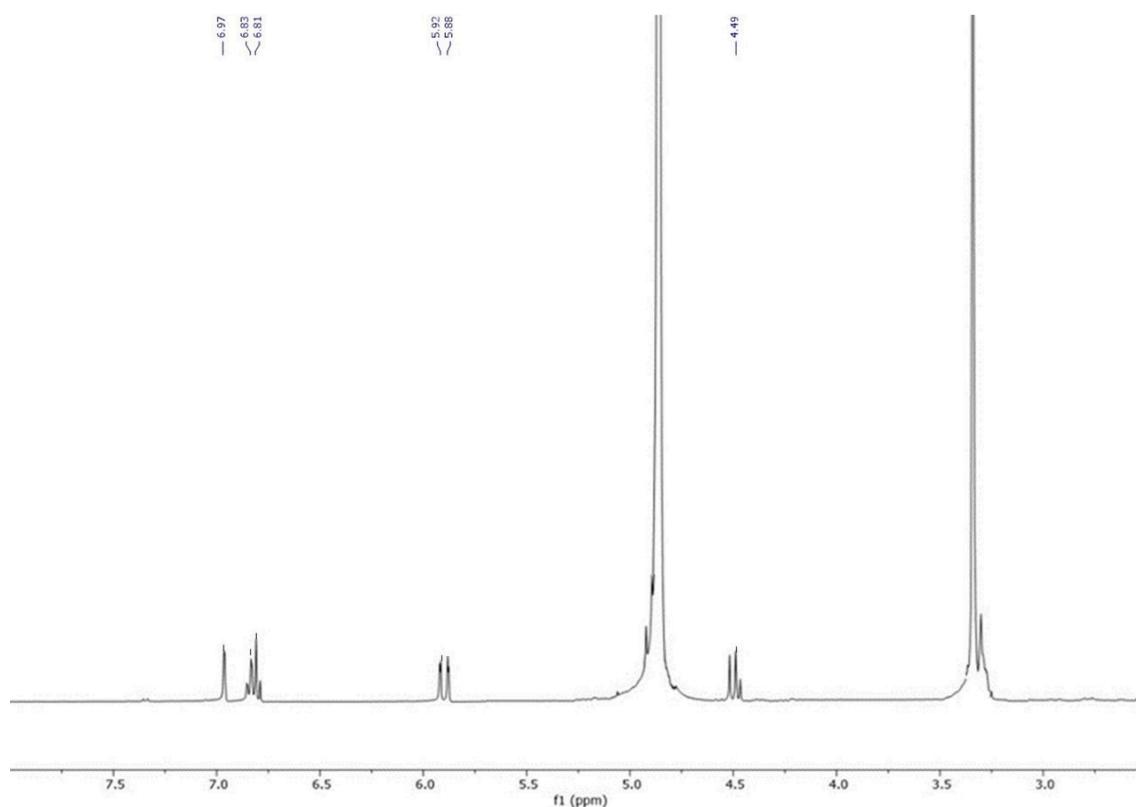

**Figure S16.** <sup>1</sup>H NMR Spectrum (600 MHz, CD<sub>3</sub>OD) of compound **15**.

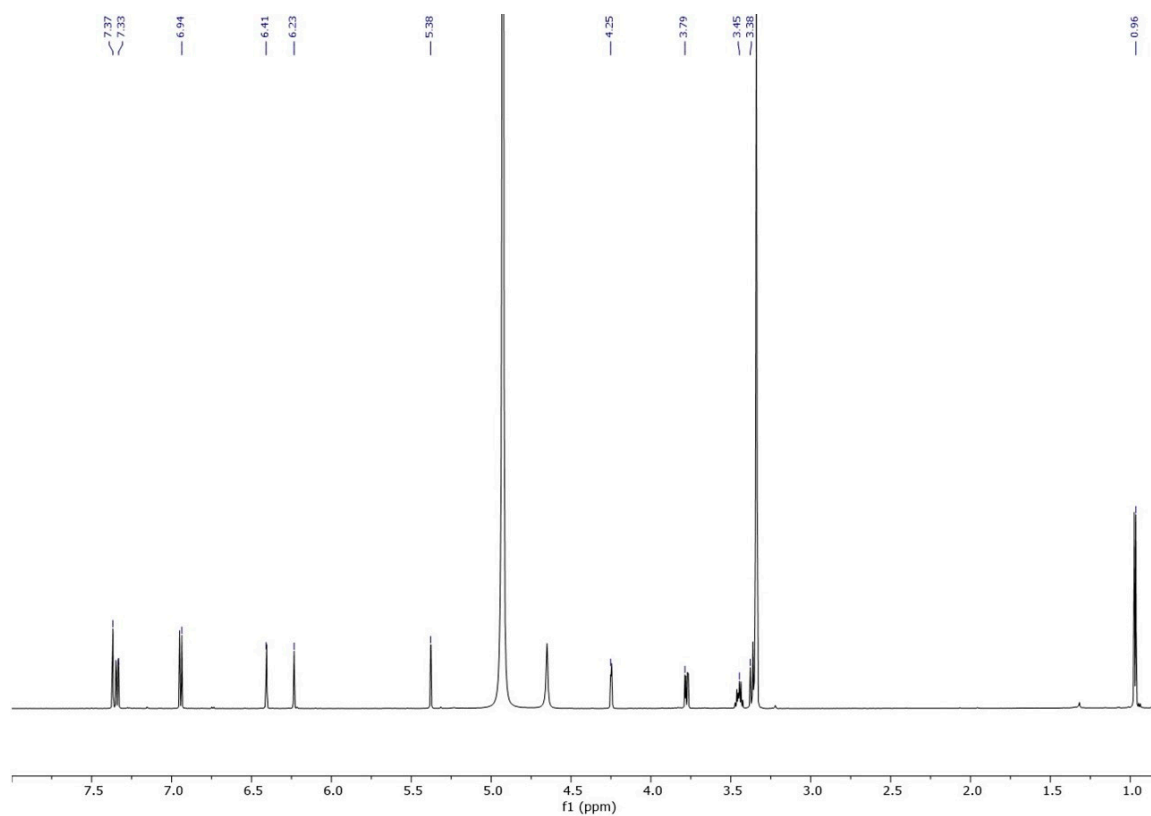

**Figure S17.** <sup>1</sup>H NMR Spectrum (600 MHz, CD<sub>3</sub>OD) of compound **16**.

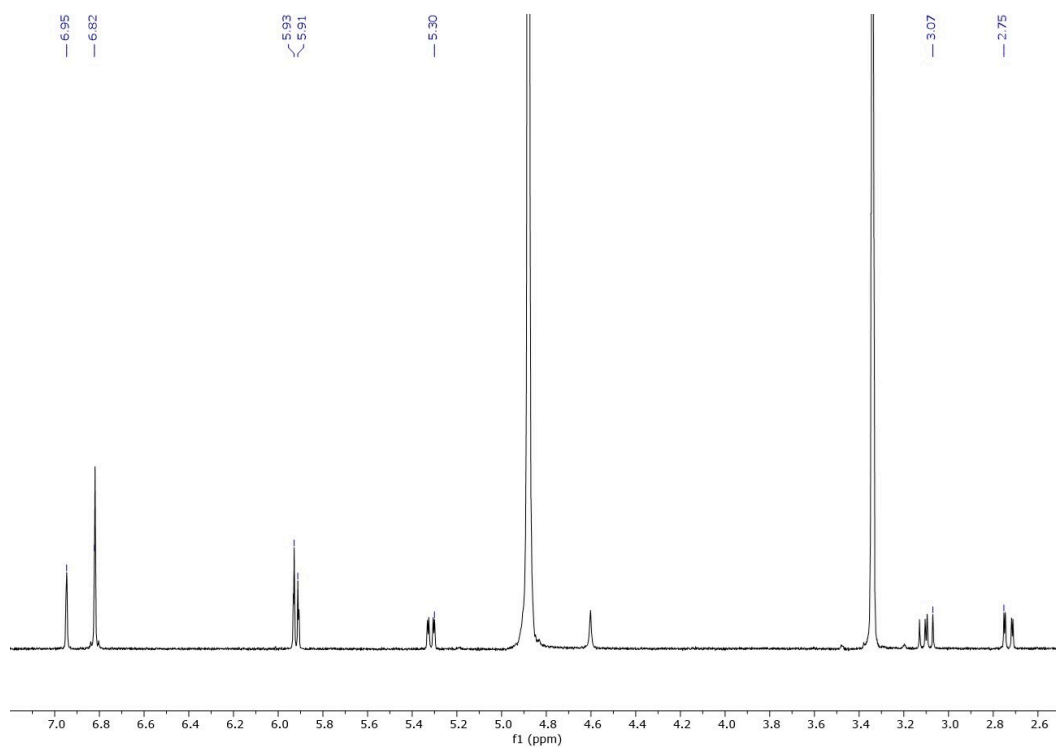

**Figure S18.** <sup>1</sup>H NMR Spectrum (600 MHz, CD<sub>3</sub>OD) of compound **17**.

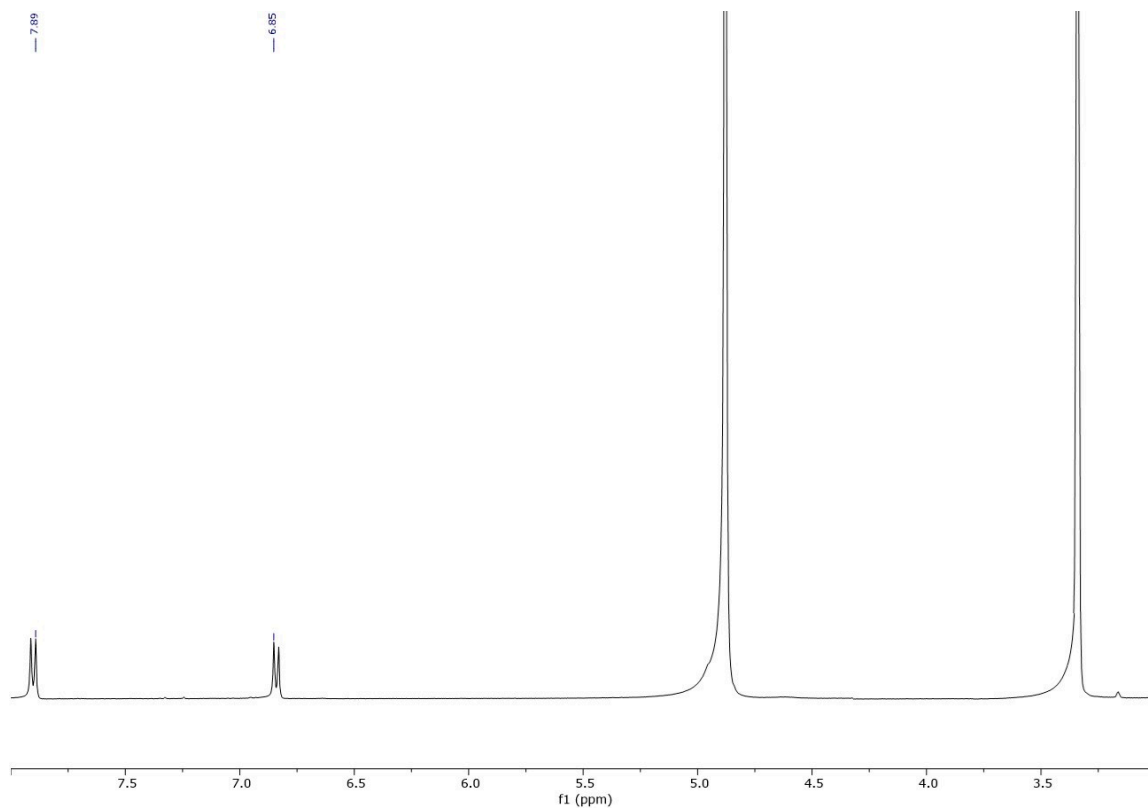

**Figure S19.** <sup>1</sup>H NMR Spectrum (600 MHz, CD<sub>3</sub>OD) of compound **18**.

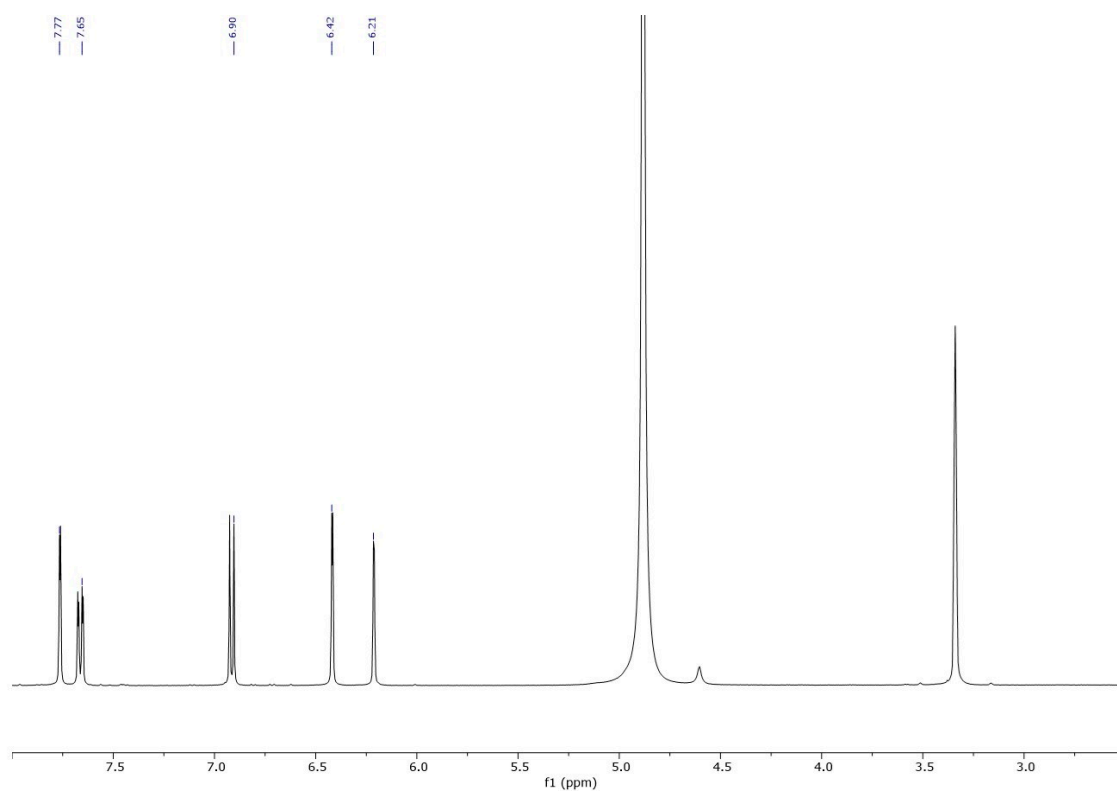

**Figure S20.**  $^1\text{H}$  NMR Spectrum (600 MHz,  $\text{CD}_3\text{OD}$ ) of compound **19**.

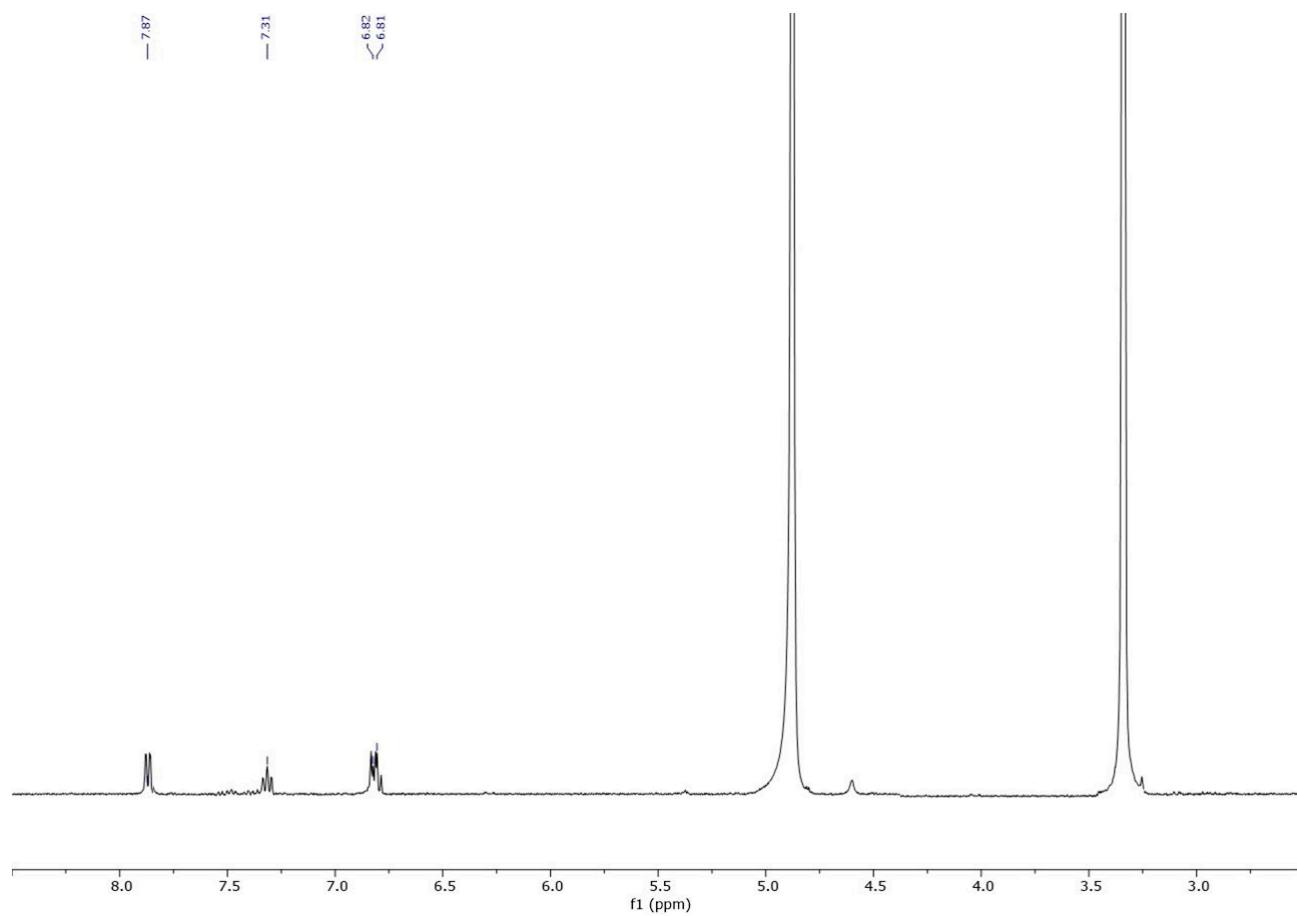

**Figure S21.**  $^1\text{H}$  NMR Spectrum (600 MHz,  $\text{CD}_3\text{OD}$ ) of compound **20**.
